# Supplementary material for: MicroRNA Expression Patterns Reveal a Role of the TGF-β Family Signaling in AML Chemo-Resistance
Source: MDPI journal article supplement (doi:10.3390/cancers15205086), 2023-10-21
Supplement: s1 [file s1]

## Supplementary Material

**Supplementary Table S1: Patient characteristics**

| Patient Nr. | Sex | Age at Diagnosis | Karyotype                         | Classification by ELN2016 | Days until relapse | Mutation profile                                                                          |
|-------------|-----|------------------|-----------------------------------|---------------------------|--------------------|-------------------------------------------------------------------------------------------|
| 1           | w   | 59               | 46 XX                             | favorable                 | 208                | NPM1mut Typ A, CEBPAwt, FLT3-ITD low ratio, FLT3 TKDwt, IDH1 R132C, IDH2wt, DNMT3A R882wt |
| 2           | w   | 57               | 46 XX                             | favorable                 | 266                | biall CEBPAmut, NPM1wt, FLT3-ITD low ratio, FLT3-TKD, IDH1 und 2 wt                       |
| 3           | m   | 38               | 46,XY,del(9)(q21q32)[2]&46,XY[29] | favorable                 | 113                | biall CEBPAmut, NPM1wt, FLT3-ITD wt, FLT3-TKD wt                                          |
| 4           | w   | 35               | 46,XX                             | intermediate              | 175                | CEBPAwt, NPM1wt, FLT3-ITD wt, FLT3-TKD wt, IDH1 und 2 wt, DNMT3A wt                       |

**Supplementary Table S2: primer sequences for qPCR targets**

| Target (human) | Forward/Reverse | Sequence (5'-3')         |
|----------------|-----------------|--------------------------|
| TGFB1          | forward         | CGTCAGGTTCTGGCTCAGG      |
|                | reverse         | ACAGCAACTTCTTCTCCCCG     |
| TGFB2          | forward         | TGGCTAACAGTGGGCAGGT      |
|                | reverse         | GCACCAGAGCCATGGAGTAG     |
| SMAD2          | forward         | AGTATGGACACAGGCTCTCCAG   |
|                | reverse         | ATCGAACACCAAAATGCAGGT    |
| SMAD3          | forward         | GGAGAAACCAAGTGACCACCA    |
|                | reverse         | GTAAGTGGCTGCAGGTCCAA     |
| SMAD4          | forward         | GTATCACCTGGAATTGATCTCTCA |
|                | reverse         | GATGGCTGTCCCTCAAAGTC     |
| ACVR2A         | forward         | GATACCATGGACAGGTTGGT     |
|                | reverse         | TACAGCGAGAAGCCAGTTCC     |
| ACVR2B         | forward         | AAGCCGTCTATTGCCACAG      |
|                | reverse         | GTCTCGTGCTACCTGTCC       |
| cMYC           | forward         | GGATTCTCTGCTCTCCTCGAC    |
|                | reverse         | CTTCTTGTTCCTCCTCAGAGTC   |
| CDKN2B         | forward         | GGATCCCAACGGAGTCAACC     |
|                | reverse         | CACCAGCGTGTCAGGAAG       |

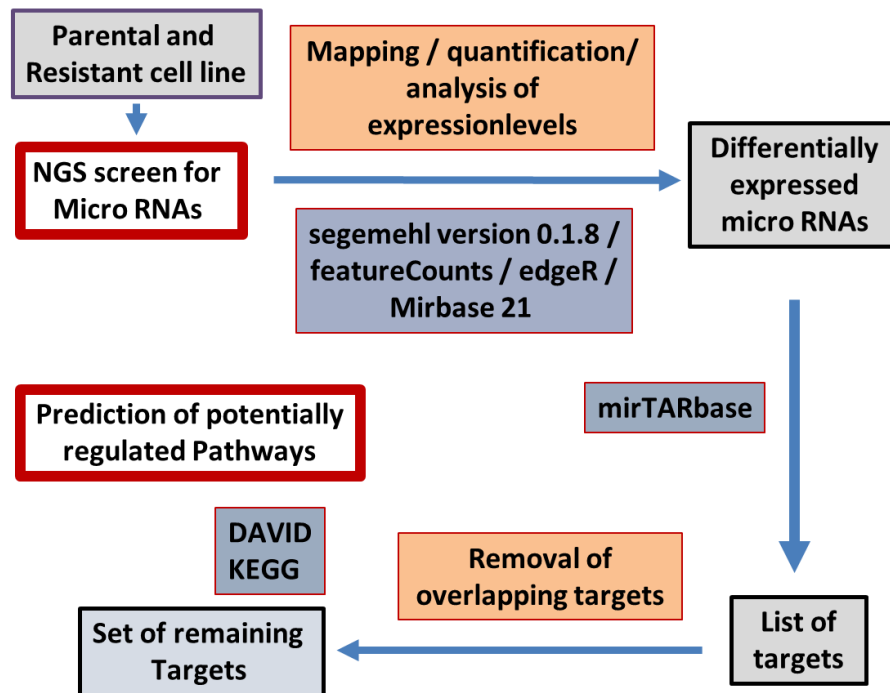

**Supplementary Figure S1:** Workflow and overview over the bioinformatic tools, programs and databases used for microRNA expression profiles and pathway analysis

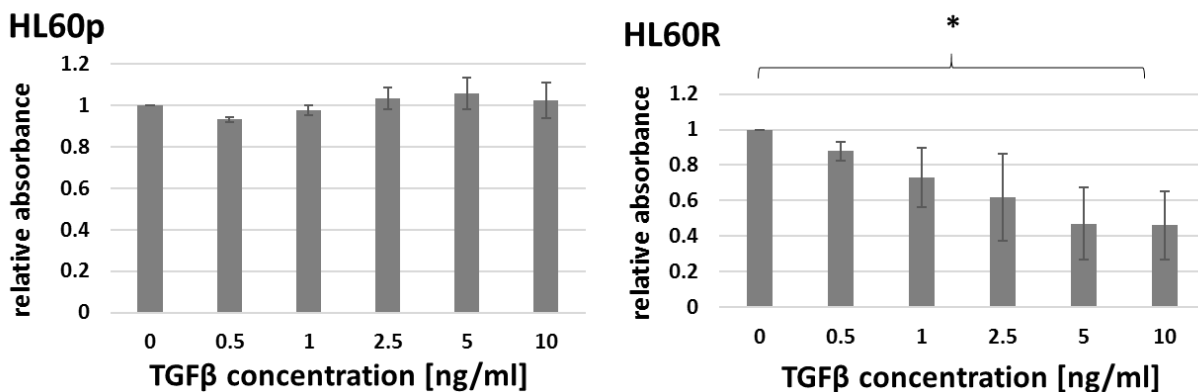

**Supplementary Figure S2: Proliferation analysis; TGFβ induced growth inhibition observed by cell counts was confirmed by MTS assays.** Relative absorbance of chemosensitive (left) and resistant (right) HL60 cells assessed by MTS assay at 490 nm after 3 days of treatment with different concentrations of TGFβ. Data is means ± S.E.M. from three independent replicates.

Sample / treatment

HL60R +

DMSO

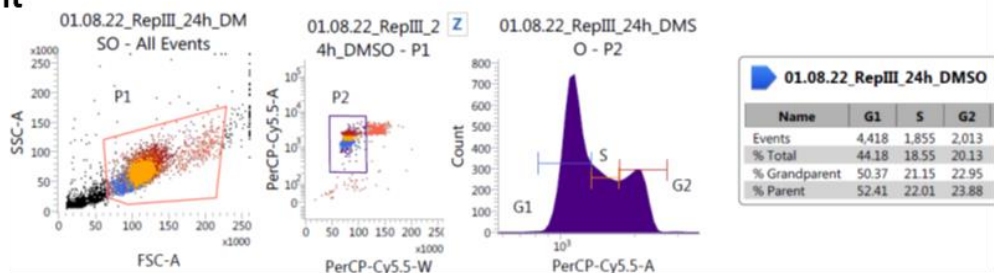

TGFβ

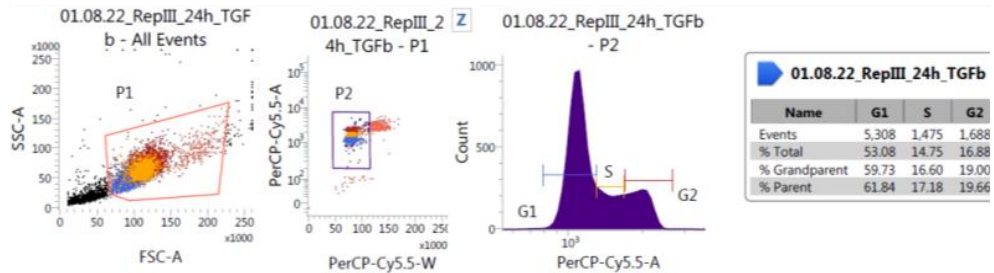

10μM ARA-C

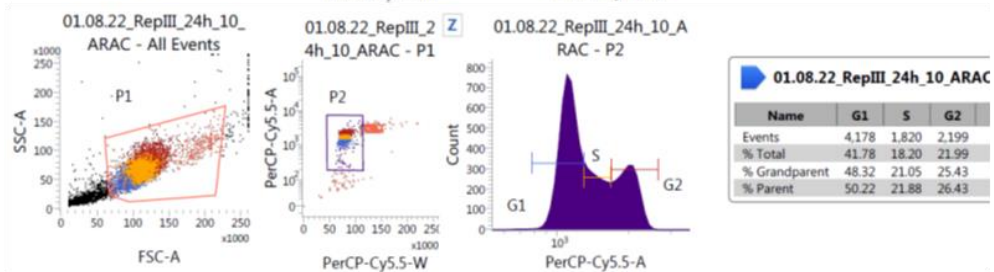

TGFβ +  
10μM ARA-C

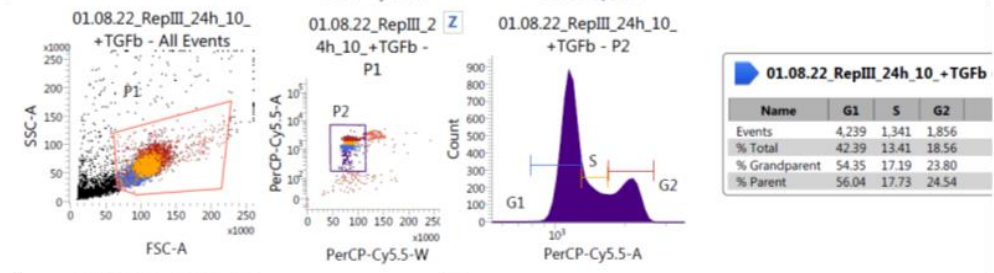

100μM ARA-C

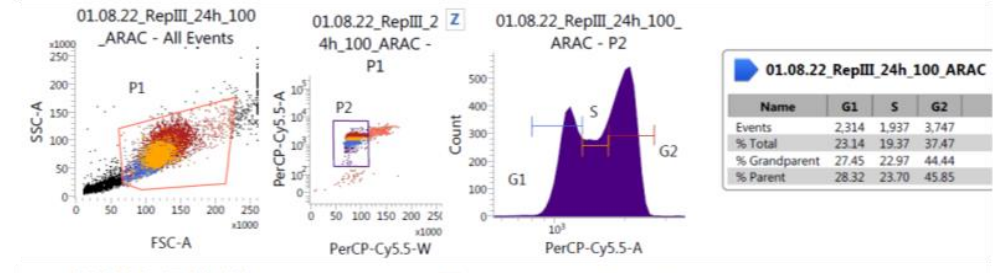

TGFβ +  
100μM ARA-C

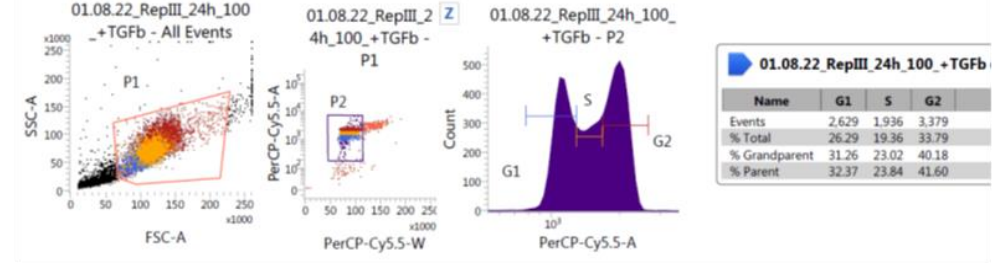

**Supplementary Figure S3: Cell cycle effects of TGF-β in combination with different concentrations of ARA-C.** Figure shows representative FACS plots of cell cycle analysis after 24 hours of treatment with different combinations of TGFβ and varying concentrations of ARA-C.

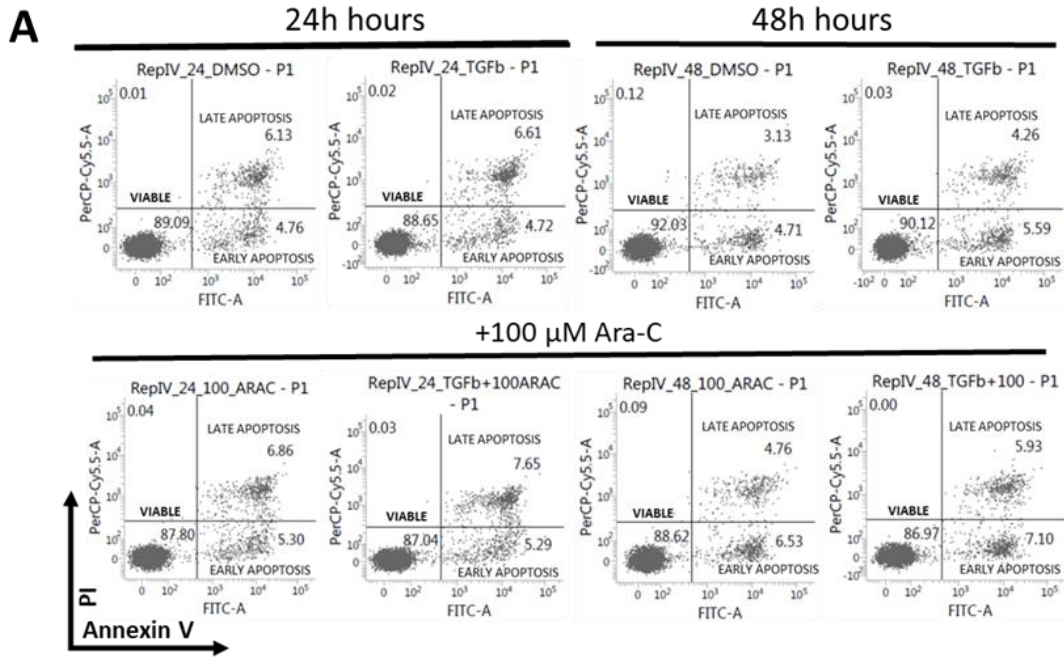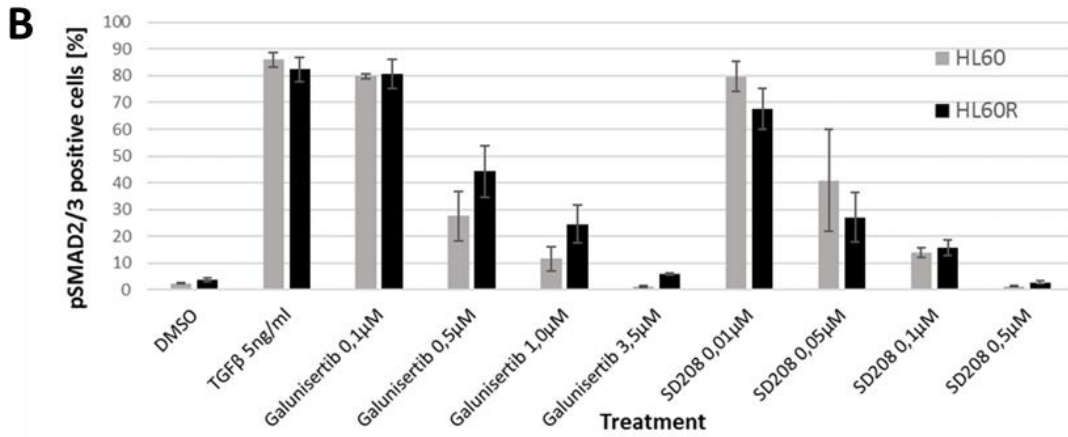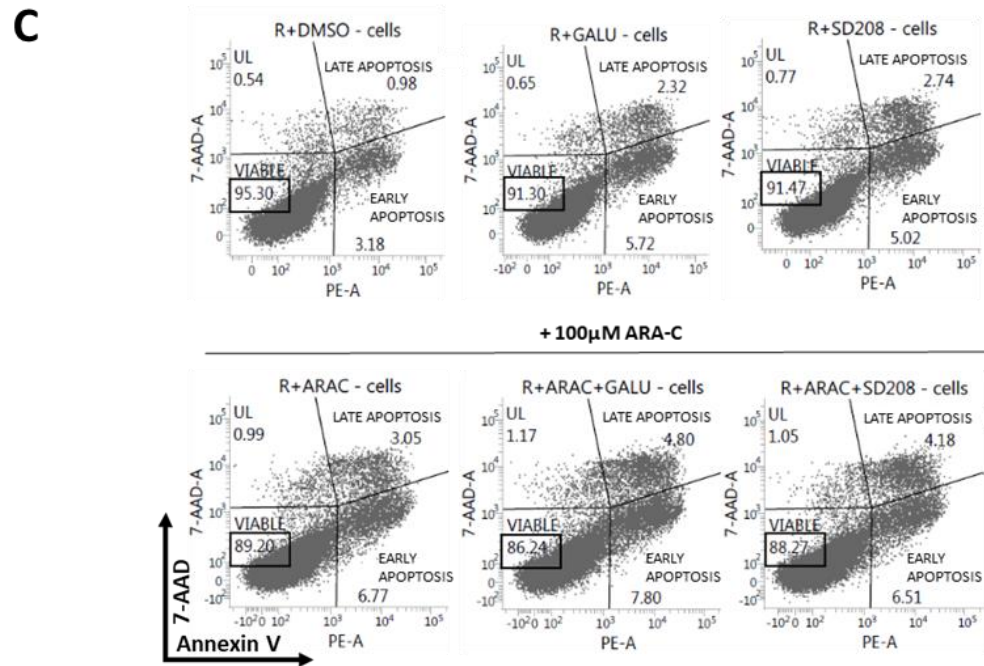

**Supplementary Figure S4:** Supplementary figure 4: A) Representative plots of flow cytometric apoptosis analysis of HL60R cells treated with DMSO (control), 100  $\mu$ M ARA-C, 5 ng/ml TGF- $\beta$  or combination (TGF- $\beta$  + ARA-C) after 24 and 48 hours. B) Induction and pharmacological abrogation of TGF $\beta$  signaling; A) Treatment of HL60/R cells with TGF- $\beta$  and TGF- $\beta$  signaling inhibitors SD208 and Galunisertib; induction and abrogation of SMAD signaling was assessed by phos-flow cytometry. C) Representative Flow-cytometric apoptosis analysis of HL60R cells after over-night treatment with Galunisertib (GALU) or SD208 with and without combination with ARA-C.
