# Supplementary figures and images for: MicroRNA Expression Patterns Reveal a Role of the TGF-β Family Signaling in AML Chemo-Resistance
Source: MDPI journal article supplement (doi:10.3390/cancers15205086), 2023-10-21

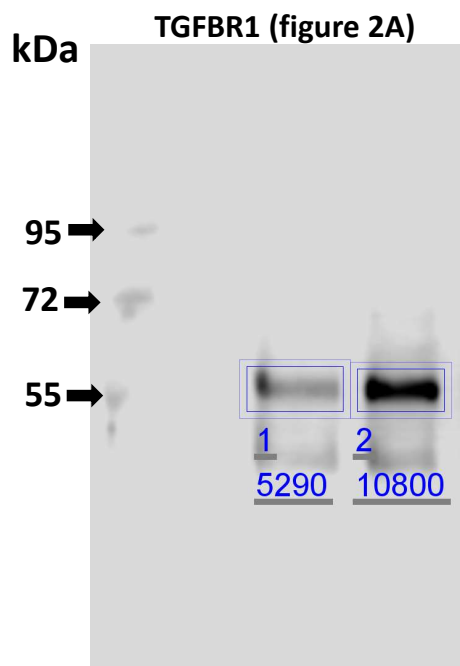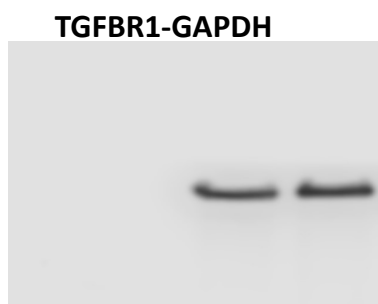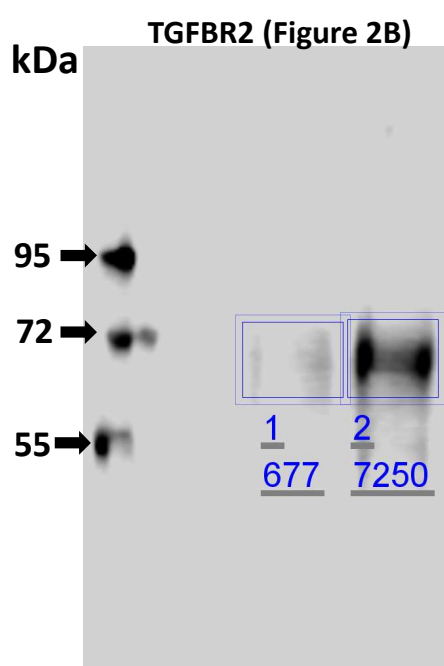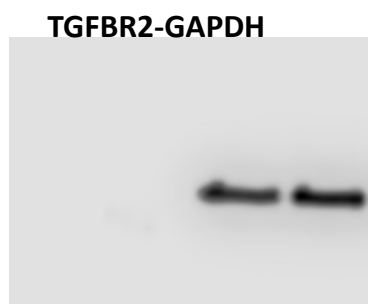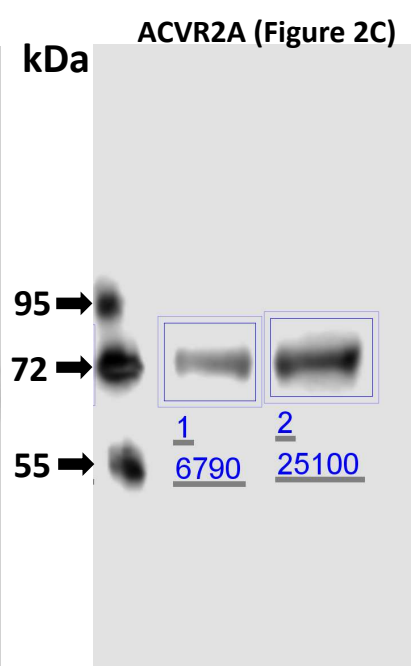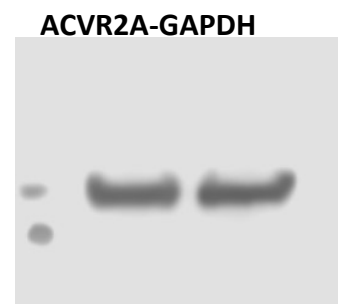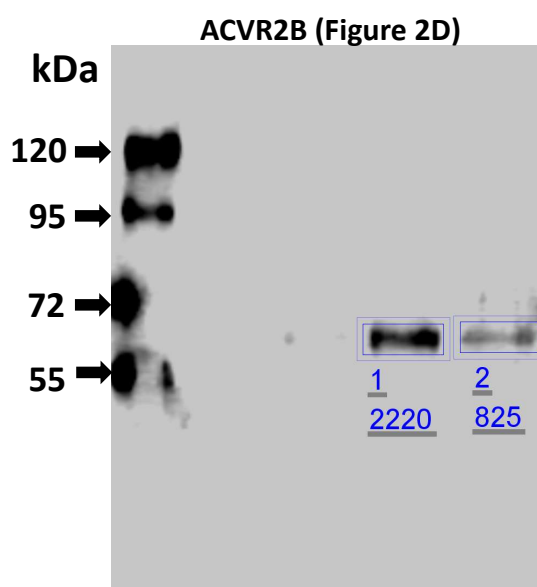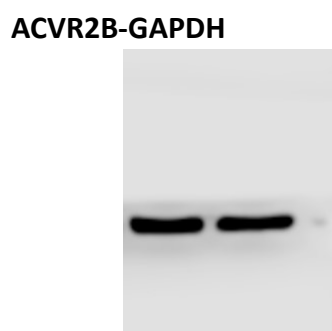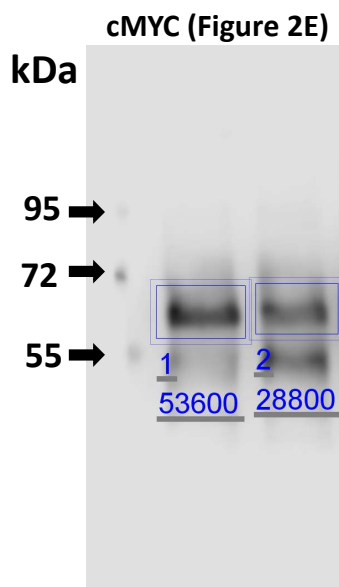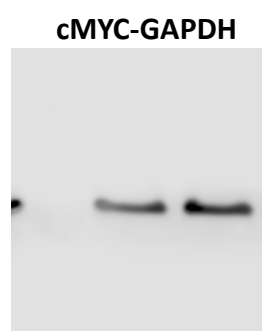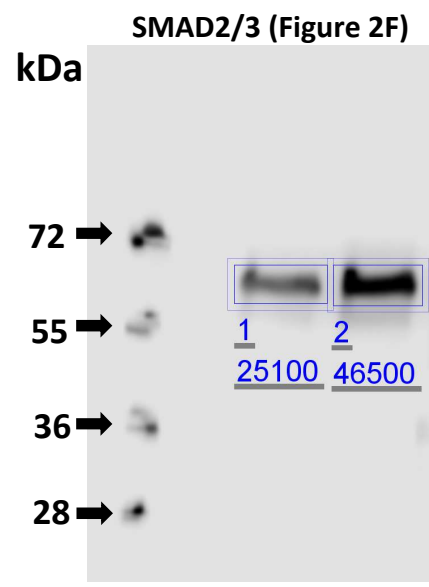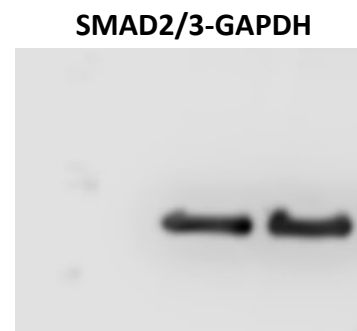

Supplement: s1 [file s1]
